# Supplementary material for: Incidental vocabulary learning from listening, reading, and viewing captioned videos: frequency and prior vocabulary knowledge
Source: publisher site journal article supplement (doi:10.1515/applirev-2023-0106), 2024-02-07
Supplement: Supplementary file 1 [file j_applirev-2023-0106_suppl_001.docx]

Appendix Pairwise comparisons of meaning recognition and form recognition

Meaning recognition (receptive knowledge)

| contrast | odds.ratio | SE | z.ratio | p.value | VLT | Groups | Frequency |
| --- | --- | --- | --- | --- | --- | --- | --- |
| Receptivepre / Receptivepost | 1.052 | 0.770 | 0.069 | 0.997 | -2 | Control | -2 |
| Receptivepre / Receptivedelayed | 1.491 | 1.102 | 0.541 | 0.851 | -2 | Control | -2 |
| Receptivepost / Receptivedelayed | 1.418 | 1.056 | 0.469 | 0.886 | -2 | Control | -2 |
| Receptivepre / Receptivepost | 1.191 | 0.413 | 0.505 | 0.869 | -2 | Control | 0 |
| Receptivepre / Receptivedelayed | 1.117 | 0.388 | 0.319 | 0.945 | -2 | Control | 0 |
| Receptivepost / Receptivedelayed | 0.938 | 0.327 | -0.184 | 0.981 | -2 | Control | 0 |
| Receptivepre / Receptivepost | 1.350 | 0.949 | 0.427 | 0.904 | -2 | Control | 2 |
| Receptivepre / Receptivedelayed | 0.837 | 0.584 | -0.255 | 0.965 | -2 | Control | 2 |
| Receptivepost / Receptivedelayed | 0.620 | 0.440 | -0.673 | 0.779 | -2 | Control | 2 |
| Receptivepre / Receptivepost | 1.885 | 1.129 | 1.059 | 0.540 | -2 | Listening | -2 |
| Receptivepre / Receptivedelayed | 1.382 | 0.934 | 0.478 | 0.882 | -2 | Listening | -2 |
| Receptivepost / Receptivedelayed | 0.733 | 0.453 | -0.503 | 0.870 | -2 | Listening | -2 |
| Receptivepre / Receptivepost | 0.826 | 0.217 | -0.729 | 0.746 | -2 | Listening | 0 |
| Receptivepre / Receptivedelayed | 1.196 | 0.351 | 0.611 | 0.814 | -2 | Listening | 0 |
| Receptivepost / Receptivedelayed | 1.449 | 0.384 | 1.397 | 0.343 | -2 | Listening | 0 |
| Receptivepre / Receptivepost | 0.362 | 0.180 | -2.048 | 0.101 | -2 | Listening | 2 |
| Receptivepre / Receptivedelayed | 1.036 | 0.596 | 0.062 | 0.998 | -2 | Listening | 2 |
| Receptivepost / Receptivedelayed | 2.864 | 1.499 | 2.010 | 0.110 | -2 | Listening | 2 |
| Receptivepre / Receptivepost | 0.955 | 0.455 | -0.097 | 0.995 | -2 | Reading | -2 |
| Receptivepre / Receptivedelayed | 1.079 | 0.552 | 0.149 | 0.988 | -2 | Reading | -2 |
| Receptivepost / Receptivedelayed | 1.131 | 0.504 | 0.275 | 0.959 | -2 | Reading | -2 |
| Receptivepre / Receptivepost | 0.541 | 0.114 | -2.913 | 0.010 | -2 | Reading | 0 |
| Receptivepre / Receptivedelayed | 0.949 | 0.212 | -0.236 | 0.970 | -2 | Reading | 0 |
| Receptivepost / Receptivedelayed | 1.754 | 0.338 | 2.913 | 0.010 | -2 | Reading | 0 |
| Receptivepre / Receptivepost | 0.306 | 0.130 | -2.796 | 0.014 | -2 | Reading | 2 |
| Receptivepre / Receptivedelayed | 0.834 | 0.380 | -0.399 | 0.916 | -2 | Reading | 2 |
| Receptivepost / Receptivedelayed | 2.721 | 1.104 | 2.468 | 0.036 | -2 | Reading | 2 |
| Receptivepre / Receptivepost | 0.304 | 0.155 | -2.330 | 0.052 | -2 | Viewing | -2 |
| Receptivepre / Receptivedelayed | 0.392 | 0.210 | -1.750 | 0.187 | -2 | Viewing | -2 |
| Receptivepost / Receptivedelayed | 1.290 | 0.613 | 0.537 | 0.853 | -2 | Viewing | -2 |
| Receptivepre / Receptivepost | 0.517 | 0.121 | -2.824 | 0.013 | -2 | Viewing | 0 |
| Receptivepre / Receptivedelayed | 0.826 | 0.202 | -0.782 | 0.714 | -2 | Viewing | 0 |
| Receptivepost / Receptivedelayed | 1.600 | 0.342 | 2.197 | 0.072 | -2 | Viewing | 0 |
| Receptivepre / Receptivepost | 0.879 | 0.439 | -0.259 | 0.964 | -2 | Viewing | 2 |
| Receptivepre / Receptivedelayed | 1.743 | 0.951 | 1.019 | 0.565 | -2 | Viewing | 2 |
| Receptivepost / Receptivedelayed | 1.984 | 0.994 | 1.367 | 0.358 | -2 | Viewing | 2 |
| Receptivepre / Receptivepost | 1.085 | 0.340 | 0.261 | 0.963 | 0 | Control | -2 |
| Receptivepre / Receptivedelayed | 1.146 | 0.370 | 0.421 | 0.907 | 0 | Control | -2 |
| Receptivepost / Receptivedelayed | 1.056 | 0.325 | 0.176 | 0.983 | 0 | Control | -2 |
| Receptivepre / Receptivepost | 1.162 | 0.173 | 1.008 | 0.572 | 0 | Control | 0 |
| Receptivepre / Receptivedelayed | 1.222 | 0.186 | 1.317 | 0.386 | 0 | Control | 0 |
| Receptivepost / Receptivedelayed | 1.052 | 0.153 | 0.349 | 0.935 | 0 | Control | 0 |
| Receptivepre / Receptivepost | 1.244 | 0.391 | 0.693 | 0.767 | 0 | Control | 2 |
| Receptivepre / Receptivedelayed | 1.304 | 0.424 | 0.817 | 0.692 | 0 | Control | 2 |
| Receptivepost / Receptivedelayed | 1.049 | 0.328 | 0.152 | 0.987 | 0 | Control | 2 |
| Receptivepre / Receptivepost | 0.427 | 0.118 | -3.067 | 0.006 | 0 | Listening | -2 |
| Receptivepre / Receptivedelayed | 0.971 | 0.310 | -0.093 | 0.995 | 0 | Listening | -2 |
| Receptivepost / Receptivedelayed | 2.273 | 0.622 | 3.002 | 0.008 | 0 | Listening | -2 |
| Receptivepre / Receptivepost | 0.447 | 0.054 | -6.609 | 0.000 | 0 | Listening | 0 |
| Receptivepre / Receptivedelayed | 1.252 | 0.174 | 1.620 | 0.237 | 0 | Listening | 0 |
| Receptivepost / Receptivedelayed | 2.799 | 0.329 | 8.756 | 0.000 | 0 | Listening | 0 |
| Receptivepre / Receptivepost | 0.469 | 0.111 | -3.213 | 0.004 | 0 | Listening | 2 |
| Receptivepre / Receptivedelayed | 1.615 | 0.449 | 1.724 | 0.196 | 0 | Listening | 2 |
| Receptivepost / Receptivedelayed | 3.446 | 0.814 | 5.239 | 0.000 | 0 | Listening | 2 |
| Receptivepre / Receptivepost | 0.244 | 0.060 | -5.704 | 0.000 | 0 | Reading | -2 |
| Receptivepre / Receptivedelayed | 0.507 | 0.138 | -2.501 | 0.033 | 0 | Reading | -2 |
| Receptivepost / Receptivedelayed | 2.082 | 0.450 | 3.398 | 0.002 | 0 | Reading | -2 |
| Receptivepre / Receptivepost | 0.306 | 0.034 | -10.806 | 0.000 | 0 | Reading | 0 |
| Receptivepre / Receptivedelayed | 0.748 | 0.089 | -2.450 | 0.038 | 0 | Reading | 0 |
| Receptivepost / Receptivedelayed | 2.442 | 0.229 | 9.540 | 0.000 | 0 | Reading | 0 |
| Receptivepre / Receptivepost | 0.385 | 0.086 | -4.298 | 0.000 | 0 | Reading | 2 |
| Receptivepre / Receptivedelayed | 1.102 | 0.271 | 0.395 | 0.918 | 0 | Reading | 2 |
| Receptivepost / Receptivedelayed | 2.864 | 0.577 | 5.221 | 0.000 | 0 | Reading | 2 |
| Receptivepre / Receptivepost | 0.203 | 0.046 | -6.997 | 0.000 | 0 | Viewing | -2 |
| Receptivepre / Receptivedelayed | 0.424 | 0.104 | -3.490 | 0.001 | 0 | Viewing | -2 |
| Receptivepost / Receptivedelayed | 2.086 | 0.411 | 3.736 | 0.001 | 0 | Viewing | -2 |
| Receptivepre / Receptivepost | 0.298 | 0.031 | -11.658 | 0.000 | 0 | Viewing | 0 |
| Receptivepre / Receptivedelayed | 0.718 | 0.080 | -2.976 | 0.008 | 0 | Viewing | 0 |
| Receptivepost / Receptivedelayed | 2.409 | 0.213 | 9.941 | 0.000 | 0 | Viewing | 0 |
| Receptivepre / Receptivepost | 0.437 | 0.097 | -3.725 | 0.001 | 0 | Viewing | 2 |
| Receptivepre / Receptivedelayed | 1.215 | 0.300 | 0.788 | 0.711 | 0 | Viewing | 2 |
| Receptivepost / Receptivedelayed | 2.782 | 0.571 | 4.988 | 0.000 | 0 | Viewing | 2 |
| Receptivepre / Receptivepost | 1.120 | 0.920 | 0.138 | 0.990 | 2 | Control | -2 |
| Receptivepre / Receptivedelayed | 0.880 | 0.732 | -0.154 | 0.987 | 2 | Control | -2 |
| Receptivepost / Receptivedelayed | 0.786 | 0.654 | -0.290 | 0.955 | 2 | Control | -2 |
| Receptivepre / Receptivepost | 1.133 | 0.433 | 0.326 | 0.943 | 2 | Control | 0 |
| Receptivepre / Receptivedelayed | 1.337 | 0.518 | 0.750 | 0.733 | 2 | Control | 0 |
| Receptivepost / Receptivedelayed | 1.180 | 0.455 | 0.430 | 0.903 | 2 | Control | 0 |
| Receptivepre / Receptivepost | 1.146 | 0.852 | 0.183 | 0.982 | 2 | Control | 2 |
| Receptivepre / Receptivedelayed | 2.032 | 1.581 | 0.912 | 0.633 | 2 | Control | 2 |
| Receptivepost / Receptivedelayed | 1.773 | 1.385 | 0.733 | 0.744 | 2 | Control | 2 |
| Receptivepre / Receptivepost | 0.097 | 0.052 | -4.358 | 0.000 | 2 | Listening | -2 |
| Receptivepre / Receptivedelayed | 0.682 | 0.434 | -0.601 | 0.820 | 2 | Listening | -2 |
| Receptivepost / Receptivedelayed | 7.053 | 3.892 | 3.540 | 0.001 | 2 | Listening | -2 |
| Receptivepre / Receptivepost | 0.242 | 0.057 | -6.032 | 0.000 | 2 | Listening | 0 |
| Receptivepre / Receptivedelayed | 1.310 | 0.361 | 0.980 | 0.590 | 2 | Listening | 0 |
| Receptivepost / Receptivedelayed | 5.407 | 1.284 | 7.106 | 0.000 | 2 | Listening | 0 |
| Receptivepre / Receptivepost | 0.607 | 0.279 | -1.086 | 0.522 | 2 | Listening | 2 |
| Receptivepre / Receptivedelayed | 2.517 | 1.422 | 1.633 | 0.232 | 2 | Listening | 2 |
| Receptivepost / Receptivedelayed | 4.146 | 2.139 | 2.756 | 0.016 | 2 | Listening | 2 |
| Receptivepre / Receptivepost | 0.062 | 0.033 | -5.268 | 0.000 | 2 | Reading | -2 |
| Receptivepre / Receptivedelayed | 0.238 | 0.135 | -2.525 | 0.031 | 2 | Reading | -2 |
| Receptivepost / Receptivedelayed | 3.836 | 1.790 | 2.881 | 0.011 | 2 | Reading | -2 |
| Receptivepre / Receptivepost | 0.173 | 0.040 | -7.552 | 0.000 | 2 | Reading | 0 |
| Receptivepre / Receptivedelayed | 0.589 | 0.145 | -2.153 | 0.080 | 2 | Reading | 0 |
| Receptivepost / Receptivedelayed | 3.400 | 0.688 | 6.044 | 0.000 | 2 | Reading | 0 |
| Receptivepre / Receptivepost | 0.483 | 0.221 | -1.587 | 0.251 | 2 | Reading | 2 |
| Receptivepre / Receptivedelayed | 1.457 | 0.722 | 0.759 | 0.728 | 2 | Reading | 2 |
| Receptivepost / Receptivedelayed | 3.013 | 1.347 | 2.467 | 0.036 | 2 | Reading | 2 |
| Receptivepre / Receptivepost | 0.136 | 0.059 | -4.625 | 0.000 | 2 | Viewing | -2 |
| Receptivepre / Receptivedelayed | 0.459 | 0.209 | -1.710 | 0.202 | 2 | Viewing | -2 |
| Receptivepost / Receptivedelayed | 3.372 | 1.324 | 3.097 | 0.006 | 2 | Viewing | -2 |
| Receptivepre / Receptivepost | 0.172 | 0.034 | -8.915 | 0.000 | 2 | Viewing | 0 |
| Receptivepre / Receptivedelayed | 0.623 | 0.129 | -2.290 | 0.057 | 2 | Viewing | 0 |
| Receptivepost / Receptivedelayed | 3.628 | 0.639 | 7.316 | 0.000 | 2 | Viewing | 0 |
| Receptivepre / Receptivepost | 0.217 | 0.092 | -3.618 | 0.001 | 2 | Viewing | 2 |
| Receptivepre / Receptivedelayed | 0.847 | 0.387 | -0.364 | 0.930 | 2 | Viewing | 2 |
| Receptivepost / Receptivedelayed | 3.902 | 1.584 | 3.354 | 0.002 | 2 | Viewing | 2 |

Form recognition (Checklist)

| contrast | odds.ratio | SE | z.ratio | p.value | VLT | Groups | Frequency |
| --- | --- | --- | --- | --- | --- | --- | --- |
| Checklistpre / Checklistpost | 1.490 | 1.127 | 0.527 | 0.858 | -2 | Control | -2 |
| Checklistpre / Checklistdelayed | 1.347 | 1.035 | 0.388 | 0.920 | -2 | Control | -2 |
| Checklistpost / Checklistdelayed | 0.904 | 0.708 | -0.129 | 0.991 | -2 | Control | -2 |
| Checklistpre / Checklistpost | 1.375 | 0.525 | 0.834 | 0.682 | -2 | Control | 0 |
| Checklistpre / Checklistdelayed | 1.293 | 0.501 | 0.663 | 0.785 | -2 | Control | 0 |
| Checklistpost / Checklistdelayed | 0.940 | 0.376 | -0.154 | 0.987 | -2 | Control | 0 |
| Checklistpre / Checklistpost | 1.269 | 0.921 | 0.328 | 0.942 | -2 | Control | 2 |
| Checklistpre / Checklistdelayed | 1.240 | 0.919 | 0.291 | 0.954 | -2 | Control | 2 |
| Checklistpost / Checklistdelayed | 0.978 | 0.729 | -0.030 | 0.999 | -2 | Control | 2 |
| Checklistpre / Checklistpost | 1.458 | 0.887 | 0.620 | 0.809 | -2 | Listening | -2 |
| Checklistpre / Checklistdelayed | 2.427 | 1.685 | 1.277 | 0.408 | -2 | Listening | -2 |
| Checklistpost / Checklistdelayed | 1.665 | 1.030 | 0.824 | 0.688 | -2 | Listening | -2 |
| Checklistpre / Checklistpost | 0.811 | 0.237 | -0.716 | 0.754 | -2 | Listening | 0 |
| Checklistpre / Checklistdelayed | 1.628 | 0.533 | 1.490 | 0.296 | -2 | Listening | 0 |
| Checklistpost / Checklistdelayed | 2.008 | 0.607 | 2.304 | 0.055 | -2 | Listening | 0 |
| Checklistpre / Checklistpost | 0.451 | 0.234 | -1.532 | 0.276 | -2 | Listening | 2 |
| Checklistpre / Checklistdelayed | 1.092 | 0.647 | 0.149 | 0.988 | -2 | Listening | 2 |
| Checklistpost / Checklistdelayed | 2.422 | 1.279 | 1.674 | 0.215 | -2 | Listening | 2 |
| Checklistpre / Checklistpost | 1.333 | 0.679 | 0.564 | 0.839 | -2 | Reading | -2 |
| Checklistpre / Checklistdelayed | 1.224 | 0.668 | 0.371 | 0.927 | -2 | Reading | -2 |
| Checklistpost / Checklistdelayed | 0.919 | 0.431 | -0.181 | 0.982 | -2 | Reading | -2 |
| Checklistpre / Checklistpost | 0.400 | 0.099 | -3.691 | 0.001 | -2 | Reading | 0 |
| Checklistpre / Checklistdelayed | 1.010 | 0.264 | 0.040 | 0.999 | -2 | Reading | 0 |
| Checklistpost / Checklistdelayed | 2.529 | 0.607 | 3.868 | 0.000 | -2 | Reading | 0 |
| Checklistpre / Checklistpost | 0.120 | 0.056 | -4.575 | 0.000 | -2 | Reading | 2 |
| Checklistpre / Checklistdelayed | 0.834 | 0.401 | -0.378 | 0.924 | -2 | Reading | 2 |
| Checklistpost / Checklistdelayed | 6.962 | 3.040 | 4.444 | 0.000 | -2 | Reading | 2 |
| Checklistpre / Checklistpost | 0.173 | 0.092 | -3.306 | 0.003 | -2 | Viewing | -2 |
| Checklistpre / Checklistdelayed | 0.202 | 0.110 | -2.939 | 0.009 | -2 | Viewing | -2 |
| Checklistpost / Checklistdelayed | 1.167 | 0.562 | 0.320 | 0.945 | -2 | Viewing | -2 |
| Checklistpre / Checklistpost | 0.354 | 0.098 | -3.770 | 0.000 | -2 | Viewing | 0 |
| Checklistpre / Checklistdelayed | 0.447 | 0.126 | -2.845 | 0.012 | -2 | Viewing | 0 |
| Checklistpost / Checklistdelayed | 1.263 | 0.333 | 0.886 | 0.649 | -2 | Viewing | 0 |
| Checklistpre / Checklistpost | 0.726 | 0.375 | -0.619 | 0.810 | -2 | Viewing | 2 |
| Checklistpre / Checklistdelayed | 0.993 | 0.539 | -0.012 | 1.000 | -2 | Viewing | 2 |
| Checklistpost / Checklistdelayed | 1.368 | 0.670 | 0.639 | 0.798 | -2 | Viewing | 2 |
| Checklistpre / Checklistpost | 1.318 | 0.434 | 0.838 | 0.679 | 0 | Control | -2 |
| Checklistpre / Checklistdelayed | 1.302 | 0.464 | 0.740 | 0.740 | 0 | Control | -2 |
| Checklistpost / Checklistdelayed | 0.988 | 0.326 | -0.037 | 0.999 | 0 | Control | -2 |
| Checklistpre / Checklistpost | 1.262 | 0.210 | 1.397 | 0.342 | 0 | Control | 0 |
| Checklistpre / Checklistdelayed | 1.242 | 0.221 | 1.218 | 0.442 | 0 | Control | 0 |
| Checklistpost / Checklistdelayed | 0.984 | 0.167 | -0.096 | 0.995 | 0 | Control | 0 |
| Checklistpre / Checklistpost | 1.209 | 0.408 | 0.562 | 0.840 | 0 | Control | 2 |
| Checklistpre / Checklistdelayed | 1.184 | 0.432 | 0.464 | 0.888 | 0 | Control | 2 |
| Checklistpost / Checklistdelayed | 0.980 | 0.330 | -0.061 | 0.998 | 0 | Control | 2 |
| Checklistpre / Checklistpost | 0.343 | 0.099 | -3.704 | 0.001 | 0 | Listening | -2 |
| Checklistpre / Checklistdelayed | 0.829 | 0.287 | -0.541 | 0.851 | 0 | Listening | -2 |
| Checklistpost / Checklistdelayed | 2.416 | 0.680 | 3.135 | 0.005 | 0 | Listening | -2 |
| Checklistpre / Checklistpost | 0.333 | 0.046 | -7.951 | 0.000 | 0 | Listening | 0 |
| Checklistpre / Checklistdelayed | 0.987 | 0.159 | -0.083 | 0.996 | 0 | Listening | 0 |
| Checklistpost / Checklistdelayed | 2.959 | 0.407 | 7.880 | 0.000 | 0 | Listening | 0 |
| Checklistpre / Checklistpost | 0.324 | 0.081 | -4.495 | 0.000 | 0 | Listening | 2 |
| Checklistpre / Checklistdelayed | 1.174 | 0.357 | 0.527 | 0.858 | 0 | Listening | 2 |
| Checklistpost / Checklistdelayed | 3.623 | 0.888 | 5.251 | 0.000 | 0 | Listening | 2 |
| Checklistpre / Checklistpost | 0.224 | 0.060 | -5.542 | 0.000 | 0 | Reading | -2 |
| Checklistpre / Checklistdelayed | 0.447 | 0.137 | -2.624 | 0.024 | 0 | Reading | -2 |
| Checklistpost / Checklistdelayed | 1.997 | 0.470 | 2.938 | 0.009 | 0 | Reading | -2 |
| Checklistpre / Checklistpost | 0.147 | 0.019 | -14.710 | 0.000 | 0 | Reading | 0 |
| Checklistpre / Checklistdelayed | 0.471 | 0.068 | -5.201 | 0.000 | 0 | Reading | 0 |
| Checklistpost / Checklistdelayed | 3.210 | 0.387 | 9.661 | 0.000 | 0 | Reading | 0 |
| Checklistpre / Checklistpost | 0.096 | 0.024 | -9.378 | 0.000 | 0 | Reading | 2 |
| Checklistpre / Checklistdelayed | 0.497 | 0.139 | -2.502 | 0.033 | 0 | Reading | 2 |
| Checklistpost / Checklistdelayed | 5.160 | 1.163 | 7.277 | 0.000 | 0 | Reading | 2 |
| Checklistpre / Checklistpost | 0.087 | 0.021 | -9.870 | 0.000 | 0 | Viewing | -2 |
| Checklistpre / Checklistdelayed | 0.239 | 0.066 | -5.189 | 0.000 | 0 | Viewing | -2 |
| Checklistpost / Checklistdelayed | 2.760 | 0.607 | 4.616 | 0.000 | 0 | Viewing | -2 |
| Checklistpre / Checklistpost | 0.106 | 0.013 | -17.786 | 0.000 | 0 | Viewing | 0 |
| Checklistpre / Checklistdelayed | 0.389 | 0.054 | -6.860 | 0.000 | 0 | Viewing | 0 |
| Checklistpost / Checklistdelayed | 3.668 | 0.433 | 11.016 | 0.000 | 0 | Viewing | 0 |
| Checklistpre / Checklistpost | 0.130 | 0.032 | -8.320 | 0.000 | 0 | Viewing | 2 |
| Checklistpre / Checklistdelayed | 0.633 | 0.174 | -1.667 | 0.218 | 0 | Viewing | 2 |
| Checklistpost / Checklistdelayed | 4.875 | 1.096 | 7.043 | 0.000 | 0 | Viewing | 2 |
| Checklistpre / Checklistpost | 1.166 | 1.010 | 0.177 | 0.983 | 2 | Control | -2 |
| Checklistpre / Checklistdelayed | 1.258 | 1.102 | 0.262 | 0.963 | 2 | Control | -2 |
| Checklistpost / Checklistdelayed | 1.079 | 0.954 | 0.086 | 0.996 | 2 | Control | -2 |
| Checklistpre / Checklistpost | 1.158 | 0.497 | 0.343 | 0.937 | 2 | Control | 0 |
| Checklistpre / Checklistdelayed | 1.193 | 0.517 | 0.406 | 0.913 | 2 | Control | 0 |
| Checklistpost / Checklistdelayed | 1.029 | 0.456 | 0.065 | 0.998 | 2 | Control | 0 |
| Checklistpre / Checklistpost | 1.151 | 0.936 | 0.173 | 0.984 | 2 | Control | 2 |
| Checklistpre / Checklistdelayed | 1.131 | 0.929 | 0.149 | 0.988 | 2 | Control | 2 |
| Checklistpost / Checklistdelayed | 0.982 | 0.810 | -0.022 | 1.000 | 2 | Control | 2 |
| Checklistpre / Checklistpost | 0.081 | 0.045 | -4.551 | 0.000 | 2 | Listening | -2 |
| Checklistpre / Checklistdelayed | 0.283 | 0.177 | -2.022 | 0.107 | 2 | Listening | -2 |
| Checklistpost / Checklistdelayed | 3.507 | 1.794 | 2.453 | 0.038 | 2 | Listening | -2 |
| Checklistpre / Checklistpost | 0.137 | 0.036 | -7.522 | 0.000 | 2 | Listening | 0 |
| Checklistpre / Checklistdelayed | 0.598 | 0.174 | -1.765 | 0.181 | 2 | Listening | 0 |
| Checklistpost / Checklistdelayed | 4.360 | 1.111 | 5.777 | 0.000 | 2 | Listening | 0 |
| Checklistpre / Checklistpost | 0.233 | 0.111 | -3.059 | 0.006 | 2 | Listening | 2 |
| Checklistpre / Checklistdelayed | 1.261 | 0.698 | 0.420 | 0.908 | 2 | Listening | 2 |
| Checklistpost / Checklistdelayed | 5.420 | 2.605 | 3.517 | 0.001 | 2 | Listening | 2 |
| Checklistpre / Checklistpost | 0.038 | 0.022 | -5.709 | 0.000 | 2 | Reading | -2 |
| Checklistpre / Checklistdelayed | 0.163 | 0.097 | -3.043 | 0.007 | 2 | Reading | -2 |
| Checklistpost / Checklistdelayed | 4.341 | 2.124 | 3.000 | 0.008 | 2 | Reading | -2 |
| Checklistpre / Checklistpost | 0.054 | 0.015 | -10.428 | 0.000 | 2 | Reading | 0 |
| Checklistpre / Checklistdelayed | 0.220 | 0.062 | -5.344 | 0.000 | 2 | Reading | 0 |
| Checklistpost / Checklistdelayed | 4.074 | 1.058 | 5.409 | 0.000 | 2 | Reading | 0 |
| Checklistpre / Checklistpost | 0.077 | 0.040 | -4.945 | 0.000 | 2 | Reading | 2 |
| Checklistpre / Checklistdelayed | 0.296 | 0.149 | -2.418 | 0.041 | 2 | Reading | 2 |
| Checklistpost / Checklistdelayed | 3.824 | 1.863 | 2.753 | 0.016 | 2 | Reading | 2 |
| Checklistpre / Checklistpost | 0.043 | 0.021 | -6.535 | 0.000 | 2 | Viewing | -2 |
| Checklistpre / Checklistdelayed | 0.283 | 0.134 | -2.667 | 0.021 | 2 | Viewing | -2 |
| Checklistpost / Checklistdelayed | 6.529 | 2.898 | 4.228 | 0.000 | 2 | Viewing | -2 |
| Checklistpre / Checklistpost | 0.032 | 0.008 | -13.894 | 0.000 | 2 | Viewing | 0 |
| Checklistpre / Checklistdelayed | 0.338 | 0.083 | -4.435 | 0.000 | 2 | Viewing | 0 |
| Checklistpost / Checklistdelayed | 10.651 | 2.566 | 9.820 | 0.000 | 2 | Viewing | 0 |
| Checklistpre / Checklistpost | 0.023 | 0.011 | -7.796 | 0.000 | 2 | Viewing | 2 |
| Checklistpre / Checklistdelayed | 0.403 | 0.188 | -1.946 | 0.126 | 2 | Viewing | 2 |
| Checklistpost / Checklistdelayed | 17.373 | 7.971 | 6.223 | 0.000 | 2 | Viewing | 2 |
